# Supplementary material for: Salinity modulates thermotolerance, energy metabolism and stress response in amphipods Gammarus lacustris
Source: PeerJ. 2016 Nov 17;4:e2657. doi: 10.7717/peerj.2657 (PMC5119240; doi:10.7717/peerj.2657)
Supplement: Data S2 [file peerj-04-2657-s002.xlsx]

## Sheet: HeatShock
Lake Shira							Lake in Irkutsk
Peroxidase							Peroxidase
Control	0.5h	1h	3h	6h			Control	0.5h	1h	3h
0.0151265	0.012121	0.0101322	0.0084407	0.0111397			0.0154566	0.0111053	0.0157255	0.0192338
0.0108873	0.00852184	0.00783461	0.0143327	0.00801428			0.0147444	0.00908375	0.0233017	0.0198217
0.0117847	0.0123213	0.0129364	0.00665931	0.010735			0.0160974	0.0106912	0.0152505	0.0194016
0.0121311	0.0104606	0.00791942	0.0126617	0.0191062			0.0133106	0.0107088	0.0144831	0.0240338
0.0138353	0.0129422	0.0109111	0.0232863	0.00391103			0.0129015	0.0146546	0.0214735	0.0165254
0.0152741	0.0130736	0.00890322	0.00399478	0.0107634			0.00849847	0.00903765	0.0139778	0.0176849
	0.0111405	0.00848434						0.0150061
	0.00934698	0.00722938						0.0141438
	0.00792405
Katalase							Katalase
Control	0.5h	1h	3h	6h			Control	0.5h	1h	3h
278.51	228.624	223.598	312.867	296.092			184.098	213.592	349.11	298.551
305.234	292.087	332.593	181.822	330.421			197.95	231.723	413.239	478.156
251.159	320.942	237.429	271.307	248.25			189.968	281.37	305.077	406.37
362.988	289.455	319.301	218.349	235.828			205.425	203.244	348.239	333.414
372.151	256.114	254.51	190.039	161.248			167.577	291.809	375.816	304.889
240.968	192.791	319.301		136.543			213.008	324.907	256.751	331.49
295.659	139.1	254.51					257.882		272.467	498.774
334.953	228.727	182.69					222.877
	231.759	209.215
	349.547
							Glutathione S-transferase
Glutathione S-transferase
							Control	0.5h	1h	3h
Control	0.5h	1h	3h	6h			3.85367	5.1909	5.28098	9.10986
3.0901	3.89023	3.29184	4.13089	4.32915			2.98878	4.8492	6.21998	5.55315
3.58701	3.1526	3.63911	3.47126	3.78792			3.0141	3.34733	9.45467	6.36639
4.31156	2.91844	3.33915	3.43185	4.12074			4.50417	4.66964	7.27499	6.11587
4.08123	2.41304	2.7229	2.93869	3.91885			5.61456	5.12738	6.96863	5.78215
4.82534	3.62606	3.34503	4.25396	3.81519			3.72334	4.5657	10.2335	10.3051
4.97764	3.52736	2.9658		4.27753			4.34391		4.8363	4.87209
3.7107	4.83513	3.27792					3.46834
	3.70056	2.92665
	4.18503	3.4514

## Sheet: Gradual
Lake Shira																Lake in Irkutsk
Peroxidase																Peroxidase
Control	9°C	11°C	13°C	15°C	17°C	19°C	21°C	23°C	25°C	27°C	29°C	31°C	33°C			Control	9°C	11°C	13°C	15°C	17°C	19°C	21°C	23°C	25°C	27°C	29°C	31°C
	1	2	3	4	5	6	7	8	9	10	11	12	13			K	1	2	3	4	5	6	7	8	9	10	11	12
0.026381	0.0189999	0.0233314	0.0268079	0.0191393	0.0182747	0.0218931	0.0239414	0.00838543	0.0146941	0.0173339	0.0141054	0.0295241	0.0181945			0.0166351	0.0399862	0.0200406	0.0150591	0.0456318	0.0116437	0.0160394	0.0169855	0.0278731	0.0189672	0.0265092	0.027585	0.0173646
0.0314888	0.0274027	0.0222905	0.0191981	0.019007	0.018761	0.0267069	0.0164225	0.0117972	0.0230423	0.017932	0.0157104	0.0168246	0.0115743			0.0209036	0.0287919	0.0378651	0.0148579	0.0187105	0.0265862	0.00770868	0.0172388	0.0309547	0.0163333	0.0385967	0.0249122	0.0136137
0.0262381	0.0222809	0.0132127	0.0194795	0.0225871	0.0151565	0.0193842	0.0125412	0.0078816	0.0253119	0.0261758	0.0200486	0.0179027	0.00801225			0.0161602	0.0298568	0.0211735	0.0295015	0.0255788	0.0259244	0.0084438	0.00963159	0.0327274	0.0326217	0.0260045	0.0382186	0.0157682
0.0366518	0.0206466	0.0223278	0.0238414	0.023693	0.0181699				0.0199182	0.01954	0.0233369	0.0258292	0.0124364			0.0156361	0.0242477	0.027871	0.0250003	0.0256484	0.0175434	0.0102428	0.00297779	0.0263945	0.0135342	0.0395263	0.0232261	0.0252817
			0.0226652										0.012803			0.0139386	0.0106387	0.0223451	0.0211647	0.0232246	0.0202586	0.0138517	0.00509362	0.0166308	0.0144964	0.0232531	0.0323208
																0.0295232	0.0223981	0.0224155	0.0403997	0.0225977	0.0230853	0.0135539	0.0102064	0.0433268	0.0158848	0.0212958	0.0262016
																0.0193258	0.0167874	0.0176677	0.0302848	0.0231714	0.031775	0.0078547	0.0212672	0.0334832	0.0323624	0.0225204
Katalase																0.0167636	0.0382102
																0.0281883
Control	9°C	11°C	13°C	15°C	17°C	19°C	21°C	23°C	25°C	27°C	29°C	31°C	33°C			0.0264786
	1	2	3	4	5	6	7	8	9	10	11	12	13			0.0147319
788.493	838.582	915.088	742.276	479.231	1051.18	760.819	698.978	841.129	566.226	1013.49	613.978	656.929	889.557			0.0201028
891.311	693.795	985.165	995.174	871.134	900.764	871.978	843.624	1123.71	647.465	1250.62	595.764	764.373	726.628			0.0348564
831.882	518.469	978.251	1039.45	847.373	775.019	1017.35	734.891	922.051	842.819	978.377	726.987	767.773	912.346
829.752	902.894	883.57	782.781	506.331	882.783	847.567	918.663	1111.03	825.525	819.309	943.154	844.78	786.987			Katalase
		1028.67	838.036								868.257		799.714
											987.732		729.538			Control	9	11	13	15	17	19	21	23	25	27	29	31
																K	1	2	3	4	5	6	7	8	9	10	11	12
																401.294	464.987	563.879	319.987	381.105	536.015	560.279	467.761	418.124	417.568	442.67	613.774	431.66
Glutathione S-transferase																475.041	443.93	405.979	562.902	443.033	451.988	399.613	446.299	559.41	397.962	484.463	395.831	550.334
																463.782	428.118	504.218	473.613	436.628	540.435	394.611	518.575	521.029	475.292	357.6	559.772	547.446
Control	9°C	11°C	13°C	15°C	17°C	19°C	21°C	23°C	25°C	27°C	29°C	31°C	33°C			401.294	509.13	400.72	574.65	566.26	586.456	515.694	502.595	487.416	592.014	414.334	436.28	453.275
1	2	3	4	5	6	7	8	9	10	11	12	13	14			475.041	570.675	558.518	483.692	630.617	559.388	586.241	637.419	473.439	538.036	482.881	416.047
8.1246	6.86321	6.57359	6.5757	7.16138	6.6558	8.92489	6.96273	7.54874	7.14161	8.65202	6.55457	6.68482	7.33429			463.782	429.21	346.14	395.552	391.151	572.851	434.614	416.865	440.139	527.112	437.641	581.307
7.50345	6.86981	8.07138	7.63594	6.46233	6.11918	8.36474	6.63086	8.34158	7.78729	7.43037	7.85842	7.24641	6.74985			275.759	329.005	348.048	550.499	452.733	546.939	410.807	506.865	475.845	599.753	314.105
7.04507	6.8565	6.70142	6.0969	6.85696	6.29981	7.40169	7.20143	6.99135	7.60506	9.07726	7.82572	6.12697	7.26555			535.819	432.11
6.79529	6.70768	7.36358	7.18166	6.85015	6.67293		6.90197	6.36629		7.28906	7.30597		8.81396			523.523
			5.96338					7.55609		6.15377	8.29288		5.32772			380.403
			5.9875										6.47236			392.698
																641.807
																400.165
																475.282
																512.527
																398.079
																Glutathione S-transferase
																Control	9	11	13	15	17	19	21	23	25	27	29	31
																K	1	2	3	4	5	6	7	8	9	10	11	12
																2.02371	2.74093	2.19344	2.53163	2.15087	2.75728	2.54888	2.10499	2.72723	2.44862	3.74733	2.72886	1.3761
																2.78325	1.84315	3.37394	2.046	2.72435	2.97248	2.04682	2.65253	1.84354	2.51128	2.44805	1.63242	2.16072
																2.42602	2.93277	1.46639	2.50192	2.8232	2.82157	2.83604	2.733	2.45066	1.41026	2.51654	2.59454	1.57965
																2.02371	2.91984	2.06221	2.30444	1.90291	3.31796	1.68107	2.40524	3.40965	1.60026	2.77026	1.86413	1.37579
																2.78325	2.58505	2.88255	2.02484	3.176	3.86625	1.80589	2.48118	2.44072	2.95786	3.15422	2.79658
																2.42602	3.08349	2.34422	3.18819	3.71782	2.03825	2.18661	2.33063	2.77093	2.17642	3.59043	2.22957
																3.37664	2.66132	1.83852	3.20692	1.66821	2.68045	2.99294	2.91091	2.44939	2.93727	3.6588
																2.55787	1.8302
																2.43755
																2.94062
																2.43305
																2.47033
																2.13198
																2.24905
																2.62679
																2.0335
