# Supplementary material for: Salinity modulates thermotolerance, energy metabolism and stress response in amphipods Gammarus lacustris
Source: PeerJ. 2016 Nov 17;4:e2657. doi: 10.7717/peerj.2657 (PMC5119240; doi:10.7717/peerj.2657)
Supplement: Data S3 [file peerj-04-2657-s003.xlsx]

## Sheet: Gradual
Lake Shira
Control	9°C	11°C	13°C	15°C	17°C	19°C	21°C	23°C	25°C	27°C	29°C	31°C	33°C
	1	2	3	4	5	6	7	8	9	10	11	12	13
0.0295964	0.0497285	0.0927369	0.0547534	0.0645933	0.469103	0.153137	0.0170861	0.0893297	0.0864764	0.0895648	0.476976	4.08704	5.57465
0.147982	0.108865	0.0779528	0.232332	0.215311	0.0355157	0.127614	0.0341723	0.104927	0.0463266	0.091109	0.0726429	1.48401	5.69542
0.134401	0.0551045	0.0403204	0.531256	0.0789474	0.0473543	0.126196	0.0128146	0.0751504	0.0494151	0.0355171	0.0603074	5.26972	2.74429
0.0752647	0.0577926	0.0577926	0.315202	0.0717703	0.0858296		0.106788	0.0453738	0.0494151	0.0463266	0.219299	1.99896	4.09909
0.0685447		0.0564485		0.0861244			0.0341723	0.0737325	0.041694	0.041694	0.0945729	1.8108	4.54745
0.0739207							0.0256292		0.0370613	0.0478708
0.0470405
Lake in Irkutsk
Control	9°C	11°C	13°C	15°C	17°C	19°C	21°C	23°C	25°C	27°C	29°C	31°C
	1	2	3	4	5	6	7	8	9	10	11	12
0.155928	0.0377198	0.0694899	0.0558998	0.0308844	0.336577	0.254105	0.580305	0.223599	2.70531	5.80305	4.90938	4.11222
0.0563074	0.529528	0.041694	0.314815	0.512681	0.374297	0.252662	0.448285	0.170366	1.27719	0.623828	0.541134	5.62725
0.0635263	0.307562	0.0262518	1.29263	0.758212	1.26506	0.909581	0.232122	1.65746	2.11014	5.00948	5.78129	5.37068
0.0288756	0.0348183	0.041694	0.269842	0.115817	0.371395		0.320618	0.796967	3.6365	0.640722	5.46647	1.90232
0.159099	0.707972	0.0586804	0.0386999	0.0648573	0.233573		0.397509	0.617938		5.47448		1.93351
0.0372665		0.0355171		0.0293402			0.626729	0.168922		6.06134		1.61314
0.1204										5.37101		4.24124

## Sheet: HeatShock
Lake Shira							Lake in Irkutsk
Control	0.5h	1h	3h	6h			Control	0.5h	1h	3h
0.111014	3.59046	0.94894	1.16945	6.42055			0.209239	0.490815	2.66929	3.45557
0.114055	0.74212	6.35972	5.58581	5.83811			0.484239	0.513512	0.397192	2.35052
0.0932984	0.357644	4.26063	2.11822	5.05021			0.922147	1.56181	1.50082	3.68253
0.152042	3.71417	1.18773	1.50704	4.96209			0.267527	1.4587	0.597206	2.31508
0.171012	3.44771	0.843036	2.52403	3.4149			0.375136		2.3055	1.90258
0.0614575	1.48358	1.96862	4.09302	1.95328
0.126202	0.329351	2.6378	3.94977	4.47845
0.0426357	1.09734	2.19617	3.10729	1.83163
0.0102326		1.5719	1.1631	2.13349
		1.4222	2.73891	1.52124
